# Supplementary material for: Satisfaction on auxiliary departments from clinical departments before, during and after COVID-19 epidemic: a retrospective study
Source: Research Square preprint supplement (doi:10.21203/rs.3.rs-7841425/v1), 2025-11-28
Supplement: Supplementary file 1 [file 9da343c6ac338be88eb4f9f2.pdf]

# **Supplementary File 1: Annual Satisfaction Questionnaires (2019-2023)**

# Contents

|                                                                                                                          |    |
|--------------------------------------------------------------------------------------------------------------------------|----|
| 2019 Annual Satisfaction Survey of Clinical Departments towards Medical-Technical and Clinical Platform Departments..... | 3  |
| 2020 Annual Satisfaction Survey of Clinical Departments towards Medical-Technical and Clinical Platform Departments..... | 6  |
| 2021 Annual Satisfaction Survey of Clinical Departments towards Medical-Technical and Clinical Platform Departments..... | 12 |
| 2022 Annual Satisfaction Survey of Clinical Departments towards Medical-Technical and Clinical Platform Departments..... | 20 |
| 2023 Annual Satisfaction Survey of Clinical Departments towards Medical-Technical and Clinical Platform Departments..... | 28 |

# 2019 Annual Satisfaction Survey of Clinical Departments towards Medical-Technical and Clinical Platform Departments

Please evaluate the following medical-technical platform department groups for the year 2019 and provide your valuable comments and suggestions..

| Department           | Evaluation Item                                                                                                                                                    | Very Satisfied (5 points) | Satisfied (4 points) | Average (3 points) | Dissatisfied (2 points) |
|----------------------|--------------------------------------------------------------------------------------------------------------------------------------------------------------------|---------------------------|----------------------|--------------------|-------------------------|
| Radiology Department |                                                                                                                                                                    | 5 points                  | 4 points             | 3 points           | 2 points                |
|                      | 1. Satisfaction with the appointment scheduling for examinations.                                                                                                  | Very Satisfied            | Satisfied            | Average            | Dissatisfied            |
|                      | 2. Satisfaction with the timeliness of radiology report issuance.                                                                                                  | Very Satisfied            | Satisfied            | Average            | Dissatisfied            |
|                      | 3. When there are queries regarding radiology reports, satisfaction with the communication and handling between the Radiology Department and clinical departments. | Very Satisfied            | Satisfied            | Average            | Dissatisfied            |
|                      | 4. Satisfaction with the accuracy and timeliness of critical value reporting by the Radiology Department.                                                          | Very Satisfied            | Satisfied            | Average            | Dissatisfied            |
|                      | 5. Satisfaction with emergency services of the Radiology Department.                                                                                               | Very Satisfied            | Satisfied            | Average            | Dissatisfied            |
|                      | 6. Your comments and suggestions (Please specify any dissatisfaction to facilitate improvement)                                                                    |                           |                      |                    |                         |
| Pathology Department |                                                                                                                                                                    | 5 points                  | 4 points             | 3 points           | 2 points                |
|                      | 1. Satisfaction with the timeliness of pathology report issuance.                                                                                                  | Very Satisfied            | Satisfied            | Average            | Dissatisfied            |
|                      | 2. When there are queries regarding pathology reports, satisfaction with the communication and handling between the Pathology Department and clinical departments. | Very Satisfied            | Satisfied            | Average            | Dissatisfied            |
|                      | 3. Satisfaction with the quality of intraoperative frozen section biopsy reports.                                                                                  | Very Satisfied            | Satisfied            | Average            | Dissatisfied            |
|                      | 4. Satisfaction with the quality of the Pathology Department's participation in clinical consultations.                                                            | Very Satisfied            | Satisfied            | Average            | Dissatisfied            |
|                      | 5. Satisfaction with the range of tests offered by the Pathology Department in meeting clinical needs.                                                             | Very Satisfied            | Satisfied            | Average            | Dissatisfied            |
|                      | 6. Your comments and suggestions (Please specify any dissatisfaction to facilitate improvement)                                                                    |                           |                      |                    |                         |

|                             |                                                                                                                                                                                  |                |           |          |              |
|-----------------------------|----------------------------------------------------------------------------------------------------------------------------------------------------------------------------------|----------------|-----------|----------|--------------|
| Ultrasound Department       |                                                                                                                                                                                  | 5 points       | 4 points  | 3 points | 2 points     |
|                             | 1. Satisfaction with the appointment scheduling for ultrasound examinations.                                                                                                     | Very Satisfied | Satisfied | Average  | Dissatisfied |
|                             | 2. Satisfaction with the timeliness of ultrasound report issuance.                                                                                                               | Very Satisfied | Satisfied | Average  | Dissatisfied |
|                             | 3. When there are queries regarding ultrasound reports, satisfaction with the communication and handling between the Ultrasound Department and clinical departments.             | Very Satisfied | Satisfied | Average  | Dissatisfied |
|                             | 4. Satisfaction with the accuracy and timeliness of critical value reporting by the Ultrasound Department.                                                                       | Very Satisfied | Satisfied | Average  | Dissatisfied |
|                             | 5. Satisfaction with emergency services of the Ultrasound Department.                                                                                                            | Very Satisfied | Satisfied | Average  | Dissatisfied |
|                             | 6. Your comments and suggestions (Please specify any dissatisfaction to facilitate improvement)                                                                                  |                |           |          |              |
| Laboratory Department       |                                                                                                                                                                                  | 5 points       | 4 points  | 3 points | 2 points     |
|                             | 1. Satisfaction with the timeliness of laboratory report issuance.                                                                                                               | Very Satisfied | Satisfied | Average  | Dissatisfied |
|                             | 2. When there are queries regarding laboratory results, satisfaction with the communication and handling between the Laboratory Department and clinical departments.             | Very Satisfied | Satisfied | Average  | Dissatisfied |
|                             | 3. Satisfaction with the accuracy and timeliness of critical value reporting by the Laboratory Department.                                                                       | Very Satisfied | Satisfied | Average  | Dissatisfied |
|                             | 4. Satisfaction with the range of laboratory tests offered in meeting clinical needs.                                                                                            | Very Satisfied | Satisfied | Average  | Dissatisfied |
|                             | 5. Satisfaction with emergency services of the Laboratory Department.                                                                                                            | Very Satisfied | Satisfied | Average  | Dissatisfied |
|                             | 6. Your comments and suggestions (Please specify any dissatisfaction to facilitate improvement)                                                                                  |                |           |          |              |
| Nuclear Medicine Department |                                                                                                                                                                                  | 5 points       | 4 points  | 3 points | 2 points     |
|                             | 1. Satisfaction with the appointment scheduling for nuclear medicine examinations.                                                                                               | Very Satisfied | Satisfied | Average  | Dissatisfied |
|                             | 2. Satisfaction with the timeliness of nuclear medicine report issuance.                                                                                                         | Very Satisfied | Satisfied | Average  | Dissatisfied |
|                             | 3. When there are queries regarding nuclear medicine reports, satisfaction with the communication and handling between the Nuclear Medicine Department and clinical departments. | Very Satisfied | Satisfied | Average  | Dissatisfied |
|                             | 4. Satisfaction with the workflow of the Nuclear Medicine Department.                                                                                                            | Very Satisfied | Satisfied | Average  | Dissatisfied |
|                             | 5. Satisfaction with the service attitude of the Nuclear Medicine Department.                                                                                                    | Very Satisfied | Satisfied | Average  | Dissatisfied |
|                             | 6. Your comments and suggestions (Please specify any dissatisfaction to facilitate improvement)                                                                                  |                |           |          |              |
| Pharmacy                    |                                                                                                                                                                                  | 5 points       | 4         | 3        | 2            |

|                           |                                                                                                                                                    |                |                 |                 |              |
|---------------------------|----------------------------------------------------------------------------------------------------------------------------------------------------|----------------|-----------------|-----------------|--------------|
| Department                |                                                                                                                                                    |                | point<br>s      | point<br>s      | points       |
|                           | 1. Satisfaction with the pharmaceutical information and services provided by the Pharmacy Department.                                              | Very Satisfied | Satisfied       | Average         | Dissatisfied |
|                           | 2. Satisfaction with the quality of the Pharmacy Department's participation in clinical consultations.                                             | Very Satisfied | Satisfied       | Average         | Dissatisfied |
|                           | 3. Satisfaction with drug supply availability.                                                                                                     | Very Satisfied | Satisfied       | Average         | Dissatisfied |
|                           | 4. Satisfaction with the delivery of clinical medications.                                                                                         | Very Satisfied | Satisfied       | Average         | Dissatisfied |
|                           | 5. Satisfaction with the services of the emergency pharmacy.                                                                                       | Very Satisfied | Satisfied       | Average         | Dissatisfied |
|                           | 6. Your comments and suggestions (Please specify any dissatisfaction to facilitate improvement)                                                    |                |                 |                 |              |
| Surgery Center            |                                                                                                                                                    | 5 points       | 4<br>point<br>s | 3<br>point<br>s | 2<br>points  |
|                           | 1. Satisfaction with the operating room scheduling based on emergency priority, surgeons' operating days and comprehensive resource considerations | Very Satisfied | Satisfied       | Average         | Dissatisfied |
|                           | 2. Satisfaction with nurse cooperation during pre-operative and intra-operative periods                                                            | Very Satisfied | Satisfied       | Average         | Dissatisfied |
|                           | 3. Satisfaction with the three-party verification led by the Surgery Center after surgery                                                          | Very Satisfied | Satisfied       | Average         | Dissatisfied |
|                           | 4. Satisfaction with the coordination between consecutive surgeries and nurse work efficiency                                                      | Very Satisfied | Satisfied       | Average         | Dissatisfied |
|                           | 5. Satisfaction with the strict adherence to aseptic principles by scrub and circulating nurses during surgery                                     | Very Satisfied | Satisfied       | Average         | Dissatisfied |
|                           | 6. Your comments and suggestions (Please specify any dissatisfaction to facilitate improvement)                                                    |                |                 |                 |              |
| Anesthesiology Department |                                                                                                                                                    | 5 points       | 4<br>point<br>s | 3<br>point<br>s | 2<br>points  |
|                           | 1. Satisfaction with pre-operative anesthesia visits.                                                                                              | Very Satisfied | Satisfied       | Average         | Dissatisfied |
|                           | 2. Satisfaction with the pre-operative three-party verification led by the Anesthesiology Department.                                              | Very Satisfied | Satisfied       | Average         | Dissatisfied |
|                           | 3. Satisfaction with intraoperative anesthesia management.                                                                                         | Very Satisfied | Satisfied       | Average         | Dissatisfied |
|                           | 4. Satisfaction with patient management in the Post-Anesthesia Care Unit (PACU).                                                                   | Very Satisfied | Satisfied       | Average         | Dissatisfied |
|                           | 5. Satisfaction with post-operative anesthesia visits.                                                                                             | Very Satisfied | Satisfied       | Average         | Dissatisfied |
|                           | 6. Your comments and suggestions (Please specify any dissatisfaction to facilitate improvement)                                                    |                |                 |                 |              |

# 2020 Annual Satisfaction Survey of Clinical Departments towards Medical-Technical and Clinical Platform Departments

Please evaluate the following medical-technical platform department groups for the year 2020 and provide your valuable comments and suggestions..

| Department           | Evaluation Item                                                                                                                                                    | Very Satisfied (5 points) | Satisfied (4 points) | Average (3points) | Dissatisfied (2 points) |
|----------------------|--------------------------------------------------------------------------------------------------------------------------------------------------------------------|---------------------------|----------------------|-------------------|-------------------------|
| Radiology Department |                                                                                                                                                                    | 5 points                  | 4 points             | 3 points          | 2 points                |
|                      | 3. Satisfaction with the appointment scheduling for examinations.                                                                                                  | Very Satisfied            | Satisfied            | Average           | Dissatisfied            |
|                      | 4. Satisfaction with the timeliness of radiology report issuance.                                                                                                  | Very Satisfied            | Satisfied            | Average           | Dissatisfied            |
|                      | 3. When there are queries regarding radiology reports, satisfaction with the communication and handling between the Radiology Department and clinical departments. | Very Satisfied            | Satisfied            | Average           | Dissatisfied            |
|                      | 4. Satisfaction with the accuracy and timeliness of critical value reporting by the Radiology Department.                                                          | Very Satisfied            | Satisfied            | Average           | Dissatisfied            |
|                      | 5. Satisfaction with emergency services of the Radiology Department.                                                                                               | Very Satisfied            | Satisfied            | Average           | Dissatisfied            |
|                      | 6. Your comments and suggestions (Please specify any dissatisfaction to facilitate improvement)                                                                    |                           |                      |                   |                         |
| Pathology Department |                                                                                                                                                                    | 5 points                  | 4 points             | 3 points          | 2 points                |
|                      | 1. Satisfaction with the timeliness of pathology report issuance.                                                                                                  | Very Satisfied            | Satisfied            | Average           | Dissatisfied            |
|                      | 2. When there are queries regarding pathology reports, satisfaction with the communication and handling between the Pathology Department and clinical              | Very Satisfied            | Satisfied            | Average           | Dissatisfied            |

|                       |                                                                                                                                                                      |                |           |          |              |
|-----------------------|----------------------------------------------------------------------------------------------------------------------------------------------------------------------|----------------|-----------|----------|--------------|
|                       | departments.                                                                                                                                                         |                |           |          |              |
|                       | 3. Satisfaction with the quality of intraoperative frozen section biopsy reports.                                                                                    | Very Satisfied | Satisfied | Average  | Dissatisfied |
|                       | 4. Satisfaction with the quality of the Pathology Department's participation in clinical consultations.                                                              | Very Satisfied | Satisfied | Average  | Dissatisfied |
|                       | 5. Satisfaction with the range of tests offered by the Pathology Department in meeting clinical needs.                                                               | Very Satisfied | Satisfied | Average  | Dissatisfied |
|                       | 6. Your comments and suggestions (Please specify any dissatisfaction to facilitate improvement)                                                                      |                |           |          |              |
| Ultrasound Department |                                                                                                                                                                      | 5 points       | 4 points  | 3 points | 2 points     |
|                       | 1. Satisfaction with the appointment scheduling for ultrasound examinations.                                                                                         | Very Satisfied | Satisfied | Average  | Dissatisfied |
|                       | 2. Satisfaction with the timeliness of ultrasound report issuance.                                                                                                   | Very Satisfied | Satisfied | Average  | Dissatisfied |
|                       | 3. When there are queries regarding ultrasound reports, satisfaction with the communication and handling between the Ultrasound Department and clinical departments. | Very Satisfied | Satisfied | Average  | Dissatisfied |
|                       | 4. Satisfaction with the accuracy and timeliness of critical value reporting by the Ultrasound Department.                                                           | Very Satisfied | Satisfied | Average  | Dissatisfied |
|                       | 5. Satisfaction with emergency services of the Ultrasound Department.                                                                                                | Very Satisfied | Satisfied | Average  | Dissatisfied |
|                       | 6. Your comments and suggestions (Please specify any dissatisfaction to facilitate improvement)                                                                      |                |           |          |              |
| Laboratory Department |                                                                                                                                                                      | 5 points       | 4 points  | 3 points | 2 points     |
|                       | 1. Satisfaction with the timeliness of laboratory report issuance.                                                                                                   | Very Satisfied | Satisfied | Average  | Dissatisfied |
|                       | 2. When there are queries regarding laboratory results, satisfaction with the communication and handling between the Laboratory Department and clinical departments. | Very Satisfied | Satisfied | Average  | Dissatisfied |
|                       | 3. Satisfaction with the accuracy and timeliness of critical value reporting by the Laboratory Department.                                                           | Very Satisfied | Satisfied | Average  | Dissatisfied |
|                       | 4. Satisfaction with the range of laboratory tests offered                                                                                                           | Very           | Satis     | Average  | Dissat       |

|                             |                                                                                                                                                                                  |                |           |          |              |
|-----------------------------|----------------------------------------------------------------------------------------------------------------------------------------------------------------------------------|----------------|-----------|----------|--------------|
|                             | in meeting clinical needs.                                                                                                                                                       | Satisfied      | Satisfied |          | Satisfied    |
|                             | 5. Satisfaction with emergency services of the Laboratory Department.                                                                                                            | Very Satisfied | Satisfied | Average  | Dissatisfied |
|                             | 6. Your comments and suggestions (Please specify any dissatisfaction to facilitate improvement)                                                                                  |                |           |          |              |
| Nuclear Medicine Department |                                                                                                                                                                                  | 5 points       | 4 points  | 3 points | 2 points     |
|                             | 1. Satisfaction with the appointment scheduling for nuclear medicine examinations.                                                                                               | Very Satisfied | Satisfied | Average  | Dissatisfied |
|                             | 2. Satisfaction with the timeliness of nuclear medicine report issuance.                                                                                                         | Very Satisfied | Satisfied | Average  | Dissatisfied |
|                             | 3. When there are queries regarding nuclear medicine reports, satisfaction with the communication and handling between the Nuclear Medicine Department and clinical departments. | Very Satisfied | Satisfied | Average  | Dissatisfied |
|                             | 4. Satisfaction with the workflow of the Nuclear Medicine Department.                                                                                                            | Very Satisfied | Satisfied | Average  | Dissatisfied |
|                             | 5. Satisfaction with the service attitude of the Nuclear Medicine Department.                                                                                                    | Very Satisfied | Satisfied | Average  | Dissatisfied |
|                             | 6. Your comments and suggestions (Please specify any dissatisfaction to facilitate improvement)                                                                                  |                |           |          |              |
| Pharmacy Department         |                                                                                                                                                                                  | 5 points       | 4 points  | 3 points | 2 points     |
|                             | 1. Satisfaction with the pharmaceutical information and services provided by the Pharmacy Department.                                                                            | Very Satisfied | Satisfied | Average  | Dissatisfied |
|                             | 2. Satisfaction with the quality of the Pharmacy Department's participation in clinical consultations.                                                                           | Very Satisfied | Satisfied | Average  | Dissatisfied |
|                             | 3. Satisfaction with drug supply availability.                                                                                                                                   | Very Satisfied | Satisfied | Average  | Dissatisfied |
|                             | 4. Satisfaction with the delivery of clinical medications.                                                                                                                       | Very Satisfied | Satisfied | Average  | Dissatisfied |
|                             | 5. Satisfaction with the services of the emergency pharmacy.                                                                                                                     | Very Satisfied | Satisfied | Average  | Dissatisfied |
|                             | 6. Your comments and suggestions (Please specify any dissatisfaction to facilitate improvement)                                                                                  |                |           |          |              |



|                           |                                                                                                                                                    |                |           |          |              |
|---------------------------|----------------------------------------------------------------------------------------------------------------------------------------------------|----------------|-----------|----------|--------------|
|                           | improvement)                                                                                                                                       |                |           |          |              |
| Surgery Center            |                                                                                                                                                    | 5 points       | 4 points  | 3 points | 2 points     |
|                           | 1. Satisfaction with the operating room scheduling based on emergency priority, surgeons' operating days and comprehensive resource considerations | Very Satisfied | Satisfied | Average  | Dissatisfied |
|                           | 2. Satisfaction with nurse cooperation during pre-operative and intra-operative periods                                                            | Very Satisfied | Satisfied | Average  | Dissatisfied |
|                           | 3. Satisfaction with the three-party verification led by the Surgery Center after surgery                                                          | Very Satisfied | Satisfied | Average  | Dissatisfied |
|                           | 4. Satisfaction with the coordination between consecutive surgeries and nurse work efficiency                                                      | Very Satisfied | Satisfied | Average  | Dissatisfied |
|                           | 5. Satisfaction with the strict adherence to aseptic principles by scrub and circulating nurses during surgery                                     | Very Satisfied | Satisfied | Average  | Dissatisfied |
|                           | 6. Your comments and suggestions (Please specify any dissatisfaction to facilitate improvement)                                                    |                |           |          |              |
| Anesthesiology Department |                                                                                                                                                    | 5 points       | 4 points  | 3 points | 2 points     |
|                           | 1. Satisfaction with pre-operative anesthesia visits.                                                                                              | Very Satisfied | Satisfied | Average  | Dissatisfied |
|                           | 2. Satisfaction with the pre-operative three-party verification led by the Anesthesiology Department.                                              | Very Satisfied | Satisfied | Average  | Dissatisfied |
|                           | 3. Satisfaction with intraoperative anesthesia management.                                                                                         | Very Satisfied | Satisfied | Average  | Dissatisfied |
|                           | 4. Satisfaction with patient management in the Post-Anesthesia Care Unit (PACU).                                                                   | Very Satisfied | Satisfied | Average  | Dissatisfied |
|                           | 5. Satisfaction with post-operative anesthesia visits.                                                                                             | Very Satisfied | Satisfied | Average  | Dissatisfied |
|                           | 6. Your comments and suggestions (Please specify any dissatisfaction to facilitate improvement)                                                    |                |           |          |              |
| Day Surgery Department    |                                                                                                                                                    | 5 points       | 4 points  | 3 points | 2 points     |
|                           | 1. Satisfaction with the workflow of the Day Surgery Department                                                                                    | Very Satisfied | Satisfied | Average  | Dissatisfied |

|                              |                                                                                                                                                                             |                |           |          |              |
|------------------------------|-----------------------------------------------------------------------------------------------------------------------------------------------------------------------------|----------------|-----------|----------|--------------|
|                              | 2. Satisfaction with patient management in the Day Surgery Department                                                                                                       | Very Satisfied | Satisfied | Average  | Dissatisfied |
|                              | 3. Satisfaction with the three-party verification led by the Day Surgery Department                                                                                         | Very Satisfied | Satisfied | Average  | Dissatisfied |
|                              | 4. Satisfaction with the follow-up of discharged patients by the Day Surgery Department                                                                                     | Very Satisfied | Satisfied | Average  | Dissatisfied |
|                              | 5. Satisfaction with the coordination between the Day Surgery Department and clinical departments                                                                           | Very Satisfied | Satisfied | Average  | Dissatisfied |
|                              | 6. Your comments and suggestions (Please specify any dissatisfaction to facilitate improvement)                                                                             |                |           |          |              |
| Blood Transfusion Department |                                                                                                                                                                             | 5 points       | 4 points  | 3 points | 2 points     |
|                              | 1. Satisfaction with the timeliness of blood test report issuance by the Blood Transfusion Department.                                                                      | Very Satisfied | Satisfied | Average  | Dissatisfied |
|                              | 2. Satisfaction with the timeliness of blood issuance when blood supply is sufficient.                                                                                      | Very Satisfied | Satisfied | Average  | Dissatisfied |
|                              | 3. When there are queries regarding blood test results, satisfaction with the communication and handling between the Blood Transfusion Department and clinical departments. | Very Satisfied | Satisfied | Average  | Dissatisfied |
|                              | 4. Satisfaction with the workflow of the Blood Transfusion Department.                                                                                                      | Very Satisfied | Satisfied | Average  | Dissatisfied |
|                              | 5. Satisfaction with emergency services of the Blood Transfusion Department.                                                                                                | Very Satisfied | Satisfied | Average  | Dissatisfied |
|                              | 6. Your comments and suggestions (Please specify any dissatisfaction to facilitate improvement)                                                                             |                |           |          |              |

**Please rate the following platform departments for their performance in 2020 and share any comments or suggestions you may have.**

| Department                        | Evaluation Item                                                                                 | Very Satisfied (5 points) | Satisfied (4 points) | Average (3 points) | Dissatisfied (2 points) |
|-----------------------------------|-------------------------------------------------------------------------------------------------|---------------------------|----------------------|--------------------|-------------------------|
| Central Sterile Supply Department | 1. Overall satisfaction with the Central Sterile Supply Department                              | Very Satisfied            | Satisfied            | Average            | Dissatisfied            |
|                                   | 2. Your comments and suggestions (Please specify any dissatisfaction to facilitate improvement) |                           |                      |                    |                         |

|                                                            |                                                                                                  |                |           |         |              |
|------------------------------------------------------------|--------------------------------------------------------------------------------------------------|----------------|-----------|---------|--------------|
|                                                            | improvement)                                                                                     |                |           |         |              |
| Blood Purification Center                                  | 1. Overall satisfaction with the Blood Purification Center                                       | Very Satisfied | Satisfied | Average | Dissatisfied |
|                                                            | 2 、 Your comments and suggestions (Please specify any dissatisfaction to facilitate improvement) |                |           |         |              |
| Outpatient Comprehensive Treatment Room                    | 1. Overall satisfaction with the Outpatient Comprehensive Treatment Room                         | Very Satisfied | Satisfied | Average | Dissatisfied |
|                                                            | 2 、 Your comments and suggestions (Please specify any dissatisfaction to facilitate improvement) |                |           |         |              |
| Endoscopy Center                                           | 1. Overall satisfaction with the Endoscopy Center                                                | Very Satisfied | Satisfied | Average | Dissatisfied |
|                                                            | 2 、 Your comments and suggestions (Please specify any dissatisfaction to facilitate improvement) |                |           |         |              |
| Emergency Operating Room (including hybrid operating room) | 1. Overall satisfaction with the Emergency Operating Room (including hybrid operating room)      | Very Satisfied | Satisfied | Average | Dissatisfied |
|                                                            | 2 、 Your comments and suggestions (Please specify any dissatisfaction to facilitate improvement) |                |           |         |              |
| Intravenous Drug Dispensing Center                         | 1. Overall satisfaction with the Intravenous Drug Dispensing Center                              | Very Satisfied | Satisfied | Average | Dissatisfied |
|                                                            | 2 、 Your comments and suggestions (Please specify any dissatisfaction to facilitate improvement) |                |           |         |              |

# 2021 Annual Satisfaction Survey of Clinical Departments towards Medical-Technical and Clinical Platform Departments

Please evaluate the following medical-technical platform department groups for the year 2021 and provide your valuable comments and suggestions..

| Department           | Evaluation Item                                                                                                                                                    | Very Satisfied (5 points) | Satisfied (4 points) | Average (3 points) | Dissatisfied (2 points) |
|----------------------|--------------------------------------------------------------------------------------------------------------------------------------------------------------------|---------------------------|----------------------|--------------------|-------------------------|
| Radiology Department |                                                                                                                                                                    | 5 points                  | 4 points             | 3 points           | 2 points                |
|                      | 5. Satisfaction with the appointment scheduling for examinations.                                                                                                  | Very Satisfied            | Satisfied            | Average            | Dissatisfied            |
|                      | 6. Satisfaction with the timeliness of radiology report issuance.                                                                                                  | Very Satisfied            | Satisfied            | Average            | Dissatisfied            |
|                      | 3. When there are queries regarding radiology reports, satisfaction with the communication and handling between the Radiology Department and clinical departments. | Very Satisfied            | Satisfied            | Average            | Dissatisfied            |
|                      | 4. Satisfaction with the accuracy and timeliness of critical value reporting by the Radiology Department.                                                          | Very Satisfied            | Satisfied            | Average            | Dissatisfied            |
|                      | 5. Satisfaction with emergency services of the Radiology Department.                                                                                               | Very Satisfied            | Satisfied            | Average            | Dissatisfied            |
|                      | 6. Your comments and suggestions (Please specify any dissatisfaction to facilitate improvement)                                                                    |                           |                      |                    |                         |
| Pathology Department |                                                                                                                                                                    | 5 points                  | 4 points             | 3 points           | 2 points                |
|                      | 1. Satisfaction with the timeliness of pathology report issuance.                                                                                                  | Very Satisfied            | Satisfied            | Average            | Dissatisfied            |
|                      | 2. When there are queries regarding pathology reports, satisfaction with the communication and handling between the Pathology Department and clinical departments. | Very Satisfied            | Satisfied            | Average            | Dissatisfied            |
|                      | 3. Satisfaction with the quality of intraoperative frozen section biopsy reports.                                                                                  | Very Satisfied            | Satisfied            | Average            | Dissatisfied            |
|                      | 4. Satisfaction with the quality of the Pathology Department's participation in clinical consultations.                                                            | Very Satisfied            | Satisfied            | Average            | Dissatisfied            |
|                      | 5. Satisfaction with the range of tests offered by the Pathology Department in meeting clinical needs.                                                             | Very Satisfied            | Satisfied            | Average            | Dissatisfied            |
|                      | 6. Your comments and suggestions (Please specify any dissatisfaction to facilitate improvement)                                                                    |                           |                      |                    |                         |
| Ultrasound           |                                                                                                                                                                    | 5 points                  | 4                    | 3                  | 2                       |

|                             |                                                                                                                                                                                  |                |                 |                 |              |
|-----------------------------|----------------------------------------------------------------------------------------------------------------------------------------------------------------------------------|----------------|-----------------|-----------------|--------------|
| Department                  |                                                                                                                                                                                  |                | point<br>s      | point<br>s      | points       |
|                             | 1. Satisfaction with the appointment scheduling for ultrasound examinations.                                                                                                     | Very Satisfied | Satisfied       | Average         | Dissatisfied |
|                             | 2. Satisfaction with the timeliness of ultrasound report issuance.                                                                                                               | Very Satisfied | Satisfied       | Average         | Dissatisfied |
|                             | 3. When there are queries regarding ultrasound reports, satisfaction with the communication and handling between the Ultrasound Department and clinical departments.             | Very Satisfied | Satisfied       | Average         | Dissatisfied |
|                             | 4. Satisfaction with the accuracy and timeliness of critical value reporting by the Ultrasound Department.                                                                       | Very Satisfied | Satisfied       | Average         | Dissatisfied |
|                             | 5. Satisfaction with emergency services of the Ultrasound Department.                                                                                                            | Very Satisfied | Satisfied       | Average         | Dissatisfied |
|                             | 6. Your comments and suggestions (Please specify any dissatisfaction to facilitate improvement)                                                                                  |                |                 |                 |              |
| Laboratory Department       |                                                                                                                                                                                  | 5 points       | 4<br>point<br>s | 3<br>point<br>s | 2<br>points  |
|                             | 1. Satisfaction with the timeliness of laboratory report issuance.                                                                                                               | Very Satisfied | Satisfied       | Average         | Dissatisfied |
|                             | 2. When there are queries regarding laboratory results, satisfaction with the communication and handling between the Laboratory Department and clinical departments.             | Very Satisfied | Satisfied       | Average         | Dissatisfied |
|                             | 3. Satisfaction with the accuracy and timeliness of critical value reporting by the Laboratory Department.                                                                       | Very Satisfied | Satisfied       | Average         | Dissatisfied |
|                             | 4. Satisfaction with the range of laboratory tests offered in meeting clinical needs.                                                                                            | Very Satisfied | Satisfied       | Average         | Dissatisfied |
|                             | 5. Satisfaction with emergency services of the Laboratory Department.                                                                                                            | Very Satisfied | Satisfied       | Average         | Dissatisfied |
|                             | 6. Your comments and suggestions (Please specify any dissatisfaction to facilitate improvement)                                                                                  |                |                 |                 |              |
| Nuclear Medicine Department |                                                                                                                                                                                  | 5 points       | 4<br>point<br>s | 3<br>point<br>s | 2<br>points  |
|                             | 1. Satisfaction with the appointment scheduling for nuclear medicine examinations.                                                                                               | Very Satisfied | Satisfied       | Average         | Dissatisfied |
|                             | 2. Satisfaction with the timeliness of nuclear medicine report issuance.                                                                                                         | Very Satisfied | Satisfied       | Average         | Dissatisfied |
|                             | 3. When there are queries regarding nuclear medicine reports, satisfaction with the communication and handling between the Nuclear Medicine Department and clinical departments. | Very Satisfied | Satisfied       | Average         | Dissatisfied |
|                             | 4. Satisfaction with the workflow of the Nuclear Medicine Department.                                                                                                            | Very Satisfied | Satisfied       | Average         | Dissatisfied |
|                             | 5. Satisfaction with the service attitude of the Nuclear Medicine Department.                                                                                                    | Very Satisfied | Satisfied       | Average         | Dissatisfied |
|                             | 6. Your comments and suggestions (Please specify any dissatisfaction to facilitate improvement)                                                                                  |                |                 |                 |              |
| Pharmacy Department         |                                                                                                                                                                                  | 5 points       | 4<br>point      | 3<br>point      | 2<br>points  |

|                              |                                                                                                                                                                             |                |           |          |              |
|------------------------------|-----------------------------------------------------------------------------------------------------------------------------------------------------------------------------|----------------|-----------|----------|--------------|
|                              |                                                                                                                                                                             |                | s         | s        |              |
|                              | 1. Satisfaction with the pharmaceutical information and services provided by the Pharmacy Department.                                                                       | Very Satisfied | Satisfied | Average  | Dissatisfied |
|                              | 2. Satisfaction with the quality of the Pharmacy Department's participation in clinical consultations.                                                                      | Very Satisfied | Satisfied | Average  | Dissatisfied |
|                              | 3. Satisfaction with drug supply availability.                                                                                                                              | Very Satisfied | Satisfied | Average  | Dissatisfied |
|                              | 4. Satisfaction with the delivery of clinical medications.                                                                                                                  | Very Satisfied | Satisfied | Average  | Dissatisfied |
|                              | 5. Satisfaction with the services of the emergency pharmacy.                                                                                                                | Very Satisfied | Satisfied | Average  | Dissatisfied |
|                              | 6. Your comments and suggestions (Please specify any dissatisfaction to facilitate improvement)                                                                             |                |           |          |              |
| Blood Transfusion Department |                                                                                                                                                                             | 5 points       | 4 points  | 3 points | 2 points     |
|                              | 1. Satisfaction with the timeliness of blood test report issuance by the Blood Transfusion Department.                                                                      | Very Satisfied | Satisfied | Average  | Dissatisfied |
|                              | 2. Satisfaction with the timeliness of blood issuance when blood supply is sufficient.                                                                                      | Very Satisfied | Satisfied | Average  | Dissatisfied |
|                              | 3. When there are queries regarding blood test results, satisfaction with the communication and handling between the Blood Transfusion Department and clinical departments. | Very Satisfied | Satisfied | Average  | Dissatisfied |
|                              | 4. Satisfaction with the workflow of the Blood Transfusion Department.                                                                                                      | Very Satisfied | Satisfied | Average  | Dissatisfied |
|                              | 5. Satisfaction with emergency services of the Blood Transfusion Department.                                                                                                | Very Satisfied | Satisfied | Average  | Dissatisfied |
|                              | 6. Your comments and suggestions (Please specify any dissatisfaction to facilitate improvement)                                                                             |                |           |          |              |
| Anesthesiology Department    |                                                                                                                                                                             | 5 points       | 4 points  | 3 points | 2 points     |
|                              | 1. Satisfaction with pre-operative anesthesia visits.                                                                                                                       | Very Satisfied | Satisfied | Average  | Dissatisfied |
|                              | 2. Satisfaction with the pre-operative three-party verification led by the Anesthesiology Department.                                                                       | Very Satisfied | Satisfied | Average  | Dissatisfied |
|                              | 3. Satisfaction with intraoperative anesthesia management.                                                                                                                  | Very Satisfied | Satisfied | Average  | Dissatisfied |
|                              | 4. Satisfaction with patient management in the Post-Anesthesia Care Unit (PACU).                                                                                            | Very Satisfied | Satisfied | Average  | Dissatisfied |
|                              | 5. Satisfaction with post-operative anesthesia visits.                                                                                                                      | Very Satisfied | Satisfied | Average  | Dissatisfied |
|                              | 6. Your comments and suggestions (Please specify any dissatisfaction to facilitate improvement)                                                                             |                |           |          |              |

**Please rate the following platform departments for their performance in 2021**

**and share any comments or suggestions you may have.**

| Department                         | Evaluation Item                                                                                  | Very Satisfied<br>(5 points) | Satisfied<br>(4 points) | Average<br>(3 points) | Dissatisfied<br>(2 points) |
|------------------------------------|--------------------------------------------------------------------------------------------------|------------------------------|-------------------------|-----------------------|----------------------------|
| Emergency Department               |                                                                                                  | 5 points                     | 4 points                | 3 points              | 2 points                   |
|                                    | 1. Satisfaction with the emergency process                                                       | Very Satisfied               | Satisfied               | Average               | Dissatisfied               |
|                                    | 2. Satisfaction with the necessity and rationality of emergency consultations                    | Very Satisfied               | Satisfied               | Average               | Dissatisfied               |
|                                    | 3. Satisfaction with the diagnosis and treatment of emergency patients                           | Very Satisfied               | Satisfied               | Average               | Dissatisfied               |
|                                    | 4. Satisfaction with the admission, transfer and handover process for emergency patients         | Very Satisfied               | Satisfied               | Average               | Dissatisfied               |
|                                    | 5. Satisfaction with the service attitude of the Emergency Department                            | Very Satisfied               | Satisfied               | Average               | Dissatisfied               |
|                                    | 6. Your comments and suggestions (Please specify any dissatisfaction to facilitate improvement)  |                              |                         |                       |                            |
| Intensive Care Medicine Department |                                                                                                  | 5 points                     | 4 points                | 3 points              | 2 points                   |
|                                    | 1. Satisfaction with the workflow of the Intensive Care Medicine Department                      | Very Satisfied               | Satisfied               | Average               | Dissatisfied               |
|                                    | 2. Satisfaction with the quality of consultations by the Intensive Care Medicine Department      | Very Satisfied               | Satisfied               | Average               | Dissatisfied               |
|                                    | 3. Satisfaction with the diagnosis and treatment by the Intensive Care Medicine Department       | Very Satisfied               | Satisfied               | Average               | Dissatisfied               |
|                                    | 4. Satisfaction with the transfer and handover process of the Intensive Care Medicine Department | Very Satisfied               | Satisfied               | Average               | Dissatisfied               |
|                                    | 5. Satisfaction with the service attitude of the Intensive Care Medicine Department              | Very Satisfied               | Satisfied               | Average               | Dissatisfied               |

|                                                                                                 |                                                                                                                                                    |                |           |          |              |
|-------------------------------------------------------------------------------------------------|----------------------------------------------------------------------------------------------------------------------------------------------------|----------------|-----------|----------|--------------|
| 6. Your comments and suggestions (Please specify any dissatisfaction to facilitate improvement) |                                                                                                                                                    |                |           |          |              |
| Surgery Center                                                                                  |                                                                                                                                                    | 5 points       | 4 points  | 3 points | 2 points     |
|                                                                                                 | 1. Satisfaction with the operating room scheduling based on emergency priority, surgeons' operating days and comprehensive resource considerations | Very Satisfied | Satisfied | Average  | Dissatisfied |
|                                                                                                 | 2. Satisfaction with nurse cooperation during pre-operative and intra-operative periods                                                            | Very Satisfied | Satisfied | Average  | Dissatisfied |
|                                                                                                 | 3. Satisfaction with the three-party verification led by the Surgery Center after surgery                                                          | Very Satisfied | Satisfied | Average  | Dissatisfied |
|                                                                                                 | 4. Satisfaction with the coordination between consecutive surgeries and nurse work efficiency                                                      | Very Satisfied | Satisfied | Average  | Dissatisfied |
|                                                                                                 | 5. Satisfaction with the strict adherence to aseptic principles by scrub and circulating nurses during surgery                                     | Very Satisfied | Satisfied | Average  | Dissatisfied |
| 6. Your comments and suggestions (Please specify any dissatisfaction to facilitate improvement) |                                                                                                                                                    |                |           |          |              |
| Health Management Center                                                                        |                                                                                                                                                    | 5 points       | 4 points  | 3 points | 2 points     |
|                                                                                                 | 1. Satisfaction with the workflow of the Health Management Center                                                                                  | Very Satisfied | Satisfied | Average  | Dissatisfied |
|                                                                                                 | 2. Satisfaction with the diagnosis and treatment at the Health Management Center                                                                   | Very Satisfied | Satisfied | Average  | Dissatisfied |
|                                                                                                 | 3. Satisfaction with the handling of critical values in physical examinations by the Health Management Center                                      | Very Satisfied | Satisfied | Average  | Dissatisfied |
|                                                                                                 | 4. Satisfaction with the health follow-up by the Health Management Center                                                                          | Very Satisfied | Satisfied | Average  | Dissatisfied |
|                                                                                                 | 5. Satisfaction with the coordination between the Health Management Center and clinical departments                                                | Very Satisfied | Satisfied | Average  | Dissatisfied |
| 6. Your comments and suggestions (Please specify any dissatisfaction to facilitate improvement) |                                                                                                                                                    |                |           |          |              |
| Day Surgery Department                                                                          |                                                                                                                                                    | 5 points       | 4 points  | 3 points | 2 points     |
|                                                                                                 | 1. Satisfaction with the workflow of the Day Surgery Department                                                                                    | Very Satisfied | Satisfied | Average  | Dissatisfied |
|                                                                                                 | 2. Satisfaction with patient management in the Day Surgery Department                                                                              | Very Satisfied | Satisfied | Average  | Dissatisfied |



|                                    |                                                                                                               |                |           |          |              |
|------------------------------------|---------------------------------------------------------------------------------------------------------------|----------------|-----------|----------|--------------|
|                                    |                                                                                                               | ed             |           |          | d            |
|                                    | 3. Satisfaction with the three-party verification led by the Day Surgery Department                           | Very Satisfied | Satisfied | Average  | Dissatisfied |
|                                    | 4. Satisfaction with the follow-up of discharged patients by the Day Surgery Department                       | Very Satisfied | Satisfied | Average  | Dissatisfied |
|                                    | 5. Satisfaction with the coordination between the Day Surgery Department and clinical departments             | Very Satisfied | Satisfied | Average  | Dissatisfied |
|                                    | 6. Your comments and suggestions (Please specify any dissatisfaction to facilitate improvement)               |                |           |          |              |
| Nutrition Department               |                                                                                                               | 5 points       | 4 points  | 3 points | 2 points     |
|                                    | 1. Satisfaction with the workflow of the Nutrition Department                                                 | Very Satisfied | Satisfied | Average  | Dissatisfied |
|                                    | 2. Satisfaction with the quality of consultations by the Nutrition Department                                 | Very Satisfied | Satisfied | Average  | Dissatisfied |
|                                    | 3. Satisfaction with the diagnosis and treatment by the Nutrition Department                                  | Very Satisfied | Satisfied | Average  | Dissatisfied |
|                                    | 4. Satisfaction with the subsequent visits of department patients to the Nutrition Clinic                     | Very Satisfied | Satisfied | Average  | Dissatisfied |
|                                    | 5. Satisfaction with the coordination between the Nutrition Department and clinical departments               | Very Satisfied | Satisfied | Average  | Dissatisfied |
|                                    | 6. Your comments and suggestions (Please specify any dissatisfaction to facilitate improvement)               |                |           |          |              |
| Rehabilitation Medicine Department |                                                                                                               | 5 points       | 4 points  | 3 points | 2 points     |
|                                    | 1. Satisfaction with the workflow of the Rehabilitation Medicine Department                                   | Very Satisfied | Satisfied | Average  | Dissatisfied |
|                                    | 2. Satisfaction with the quality of consultations by the Rehabilitation Medicine Department                   | Very Satisfied | Satisfied | Average  | Dissatisfied |
|                                    | 3. Satisfaction with the diagnosis and treatment by the Rehabilitation Medicine Department                    | Very Satisfied | Satisfied | Average  | Dissatisfied |
|                                    | 4. Satisfaction with the subsequent visits of department patients to the Rehabilitation Medicine Clinic       | Very Satisfied | Satisfied | Average  | Dissatisfied |
|                                    | 5. Satisfaction with the coordination between the Rehabilitation Medicine Department and clinical departments | Very Satisfied | Satisfied | Average  | Dissatisfied |

|                                |                                                                                                           |                |           |          |              |
|--------------------------------|-----------------------------------------------------------------------------------------------------------|----------------|-----------|----------|--------------|
|                                |                                                                                                           | ed             |           |          | d            |
|                                | 6. Your comments and suggestions (Please specify any dissatisfaction to facilitate improvement)           |                |           |          |              |
| Clinical Psychology Department |                                                                                                           | 5 points       | 4 points  | 3 points | 2 points     |
|                                | 1. Satisfaction with the workflow of the Clinical Psychology Department                                   | Very Satisfied | Satisfied | Average  | Dissatisfied |
|                                | 2. Satisfaction with the quality of consultations by the Clinical Psychology Department                   | Very Satisfied | Satisfied | Average  | Dissatisfied |
|                                | 3. Satisfaction with the diagnosis and treatment by the Clinical Psychology Department                    | Very Satisfied | Satisfied | Average  | Dissatisfied |
|                                | 4. Satisfaction with the subsequent visits of department patients to the Clinical Psychology Clinic       | Very Satisfied | Satisfied | Average  | Dissatisfied |
|                                | 5. Satisfaction with the coordination between the Clinical Psychology Department and clinical departments | Very Satisfied | Satisfied | Average  | Dissatisfied |
|                                | 6. Your comments and suggestions (Please specify any dissatisfaction to facilitate improvement)           |                |           |          |              |

**Please rate the following platform departments for their performance in 2021 and share any comments or suggestions you may have.**

| Department                              | Evaluation Item                                                                                 | Very Satisfied (5 points) | Satisfied (4 points) | Average (3 points) | Dissatisfied (2 points) |
|-----------------------------------------|-------------------------------------------------------------------------------------------------|---------------------------|----------------------|--------------------|-------------------------|
| Central Sterile Supply Department       | 1. Overall satisfaction with the Central Sterile Supply Department                              | Very Satisfied            | Satisfied            | Average            | Dissatisfied            |
|                                         | 2. Your comments and suggestions (Please specify any dissatisfaction to facilitate improvement) |                           |                      |                    |                         |
| Blood Purification Center               | 1. Overall satisfaction with the Blood Purification Center                                      | Very Satisfied            | Satisfied            | Average            | Dissatisfied            |
|                                         | 2. Your comments and suggestions (Please specify any dissatisfaction to facilitate improvement) |                           |                      |                    |                         |
| Outpatient Comprehensive Treatment Room | 1. Overall satisfaction with the Outpatient Comprehensive Treatment Room                        | Very Satisfied            | Satisfied            | Average            | Dissatisfied            |
|                                         | 2. Your comments and suggestions (Please specify any dissatisfaction to facilitate improvement) |                           |                      |                    |                         |
| Endoscopy Center                        | 1. Overall satisfaction with the Endoscopy Center                                               | Very Satisfied            | Satisfied            | Average            | Dissatisfied            |
|                                         | 2. Your comments and suggestions (Please specify any dissatisfaction to facilitate improvement) |                           |                      |                    |                         |
| Emergency Operating Room (including)    | 1. Overall satisfaction with the Emergency Operating Room (including hybrid operating room)     | Very Satisfied            | Satisfied            | Average            | Dissatisfied            |
|                                         | 2. Your comments and suggestions (Please specify any dissatisfaction to facilitate improvement) |                           |                      |                    |                         |

|                                             |                                                                                                 |                   |           |         |              |
|---------------------------------------------|-------------------------------------------------------------------------------------------------|-------------------|-----------|---------|--------------|
| hybrid<br>operating<br>room)                |                                                                                                 |                   |           |         |              |
| Intravenous<br>Drug<br>Dispensing<br>Center | 1. Overall satisfaction with the Intravenous Drug<br>Dispensing Center                          | Very<br>Satisfied | Satisfied | Average | Dissatisfied |
|                                             | 2、 Your comments and suggestions (Please specify any dissatisfaction to facilitate improvement) |                   |           |         |              |
| 120<br>Emergency<br>Center                  | 1. Overall satisfaction with the 120 Emergency<br>Center                                        | Very<br>Satisfied | Satisfied | Average | Dissatisfied |
|                                             | 2、 Your comments and suggestions (Please specify any dissatisfaction to facilitate improvement) |                   |           |         |              |
| Fever Clinic                                | 1. Overall satisfaction with the Fever Clinic                                                   | Very<br>Satisfied | Satisfied | Average | Dissatisfied |
|                                             | 2、 Your comments and suggestions (Please specify any dissatisfaction to facilitate improvement) |                   |           |         |              |
| Medical<br>Laboratory<br>Center             | 1. Overall satisfaction with the Medical Laboratory<br>Center                                   | Very<br>Satisfied | Satisfied | Average | Dissatisfied |
|                                             | 2、 Your comments and suggestions (Please specify any dissatisfaction to facilitate improvement) |                   |           |         |              |
| Radiotherapy<br>Center                      | 1. Overall satisfaction with the Radiotherapy<br>Center                                         | Very<br>Satisfied | Satisfied | Average | Dissatisfied |
|                                             | 2、 Your comments and suggestions (Please specify any dissatisfaction to facilitate improvement) |                   |           |         |              |

# 2022 Annual Satisfaction Survey of Clinical Departments towards Medical-Technical and Clinical Platform Departments

Please evaluate the following medical-technical platform department groups for the year 2022 and provide your valuable comments and suggestions..

| Department           | Evaluation Item                                                                                                                                                    | Very Satisfied (5 points) | Satisfied (4 points) | Average (3 points) | Dissatisfied (2 points) |
|----------------------|--------------------------------------------------------------------------------------------------------------------------------------------------------------------|---------------------------|----------------------|--------------------|-------------------------|
| Radiology Department |                                                                                                                                                                    | 5 points                  | 4 points             | 3 points           | 2 points                |
|                      | 7. Satisfaction with the appointment scheduling for examinations.                                                                                                  | Very Satisfied            | Satisfied            | Average            | Dissatisfied            |
|                      | 8. Satisfaction with the timeliness of radiology report issuance.                                                                                                  | Very Satisfied            | Satisfied            | Average            | Dissatisfied            |
|                      | 3. When there are queries regarding radiology reports, satisfaction with the communication and handling between the Radiology Department and clinical departments. | Very Satisfied            | Satisfied            | Average            | Dissatisfied            |
|                      | 4. Satisfaction with the accuracy and timeliness of critical value reporting by the Radiology Department.                                                          | Very Satisfied            | Satisfied            | Average            | Dissatisfied            |
|                      | 5. Satisfaction with emergency services of the Radiology Department.                                                                                               | Very Satisfied            | Satisfied            | Average            | Dissatisfied            |
|                      | 6. Your comments and suggestions (Please specify any dissatisfaction to facilitate improvement)                                                                    |                           |                      |                    |                         |
| Pathology Department |                                                                                                                                                                    | 5 points                  | 4 points             | 3 points           | 2 points                |
|                      | 1. Satisfaction with the timeliness of pathology report issuance.                                                                                                  | Very Satisfied            | Satisfied            | Average            | Dissatisfied            |
|                      | 2. When there are queries regarding pathology reports, satisfaction with the communication and handling between the Pathology Department and clinical departments. | Very Satisfied            | Satisfied            | Average            | Dissatisfied            |
|                      | 3. Satisfaction with the quality of intraoperative frozen section biopsy reports.                                                                                  | Very Satisfied            | Satisfied            | Average            | Dissatisfied            |
|                      | 4. Satisfaction with the quality of the Pathology Department's participation in clinical consultations.                                                            | Very Satisfied            | Satisfied            | Average            | Dissatisfied            |
|                      | 5. Satisfaction with the range of tests offered by the Pathology Department in meeting clinical needs.                                                             | Very Satisfied            | Satisfied            | Average            | Dissatisfied            |
|                      | 6. Your comments and suggestions (Please specify any dissatisfaction to facilitate improvement)                                                                    |                           |                      |                    |                         |

|                             |                                                                                                                                                                                  |                |           |          |              |
|-----------------------------|----------------------------------------------------------------------------------------------------------------------------------------------------------------------------------|----------------|-----------|----------|--------------|
| Ultrasound Department       |                                                                                                                                                                                  | 5 points       | 4 points  | 3 points | 2 points     |
|                             | 1. Satisfaction with the appointment scheduling for ultrasound examinations.                                                                                                     | Very Satisfied | Satisfied | Average  | Dissatisfied |
|                             | 2. Satisfaction with the timeliness of ultrasound report issuance.                                                                                                               | Very Satisfied | Satisfied | Average  | Dissatisfied |
|                             | 3. When there are queries regarding ultrasound reports, satisfaction with the communication and handling between the Ultrasound Department and clinical departments.             | Very Satisfied | Satisfied | Average  | Dissatisfied |
|                             | 4. Satisfaction with the accuracy and timeliness of critical value reporting by the Ultrasound Department.                                                                       | Very Satisfied | Satisfied | Average  | Dissatisfied |
|                             | 5. Satisfaction with emergency services of the Ultrasound Department.                                                                                                            | Very Satisfied | Satisfied | Average  | Dissatisfied |
|                             | 6. Your comments and suggestions (Please specify any dissatisfaction to facilitate improvement)                                                                                  |                |           |          |              |
| Laboratory Department       |                                                                                                                                                                                  | 5 points       | 4 points  | 3 points | 2 points     |
|                             | 1. Satisfaction with the timeliness of laboratory report issuance.                                                                                                               | Very Satisfied | Satisfied | Average  | Dissatisfied |
|                             | 2. When there are queries regarding laboratory results, satisfaction with the communication and handling between the Laboratory Department and clinical departments.             | Very Satisfied | Satisfied | Average  | Dissatisfied |
|                             | 3. Satisfaction with the accuracy and timeliness of critical value reporting by the Laboratory Department.                                                                       | Very Satisfied | Satisfied | Average  | Dissatisfied |
|                             | 4. Satisfaction with the range of laboratory tests offered in meeting clinical needs.                                                                                            | Very Satisfied | Satisfied | Average  | Dissatisfied |
|                             | 5. Satisfaction with emergency services of the Laboratory Department.                                                                                                            | Very Satisfied | Satisfied | Average  | Dissatisfied |
|                             | 6. Your comments and suggestions (Please specify any dissatisfaction to facilitate improvement)                                                                                  |                |           |          |              |
| Nuclear Medicine Department |                                                                                                                                                                                  | 5 points       | 4 points  | 3 points | 2 points     |
|                             | 1. Satisfaction with the appointment scheduling for nuclear medicine examinations.                                                                                               | Very Satisfied | Satisfied | Average  | Dissatisfied |
|                             | 2. Satisfaction with the timeliness of nuclear medicine report issuance.                                                                                                         | Very Satisfied | Satisfied | Average  | Dissatisfied |
|                             | 3. When there are queries regarding nuclear medicine reports, satisfaction with the communication and handling between the Nuclear Medicine Department and clinical departments. | Very Satisfied | Satisfied | Average  | Dissatisfied |
|                             | 4. Satisfaction with the workflow of the Nuclear Medicine Department.                                                                                                            | Very Satisfied | Satisfied | Average  | Dissatisfied |
|                             | 5. Satisfaction with the service attitude of the Nuclear Medicine Department.                                                                                                    | Very Satisfied | Satisfied | Average  | Dissatisfied |
|                             | 6. Your comments and suggestions (Please specify any dissatisfaction to facilitate improvement)                                                                                  |                |           |          |              |
| Pharmacy                    |                                                                                                                                                                                  | 5 points       | 4         | 3        | 2            |

|                              |                                                                                                                                                                             |                |                 |                 |              |
|------------------------------|-----------------------------------------------------------------------------------------------------------------------------------------------------------------------------|----------------|-----------------|-----------------|--------------|
| Department                   |                                                                                                                                                                             |                | point<br>s      | point<br>s      | points       |
|                              | 1. Satisfaction with the pharmaceutical information and services provided by the Pharmacy Department.                                                                       | Very Satisfied | Satisfied       | Average         | Dissatisfied |
|                              | 2. Satisfaction with the quality of the Pharmacy Department's participation in clinical consultations.                                                                      | Very Satisfied | Satisfied       | Average         | Dissatisfied |
|                              | 3. Satisfaction with drug supply availability.                                                                                                                              | Very Satisfied | Satisfied       | Average         | Dissatisfied |
|                              | 4. Satisfaction with the delivery of clinical medications.                                                                                                                  | Very Satisfied | Satisfied       | Average         | Dissatisfied |
|                              | 5. Satisfaction with the services of the emergency pharmacy.                                                                                                                | Very Satisfied | Satisfied       | Average         | Dissatisfied |
|                              | 6. Your comments and suggestions (Please specify any dissatisfaction to facilitate improvement)                                                                             |                |                 |                 |              |
| Blood Transfusion Department |                                                                                                                                                                             | 5 points       | 4<br>point<br>s | 3<br>point<br>s | 2<br>points  |
|                              | 1. Satisfaction with the timeliness of blood test report issuance by the Blood Transfusion Department.                                                                      | Very Satisfied | Satisfied       | Average         | Dissatisfied |
|                              | 2. Satisfaction with the timeliness of blood issuance when blood supply is sufficient.                                                                                      | Very Satisfied | Satisfied       | Average         | Dissatisfied |
|                              | 3. When there are queries regarding blood test results, satisfaction with the communication and handling between the Blood Transfusion Department and clinical departments. | Very Satisfied | Satisfied       | Average         | Dissatisfied |
|                              | 4. Satisfaction with the workflow of the Blood Transfusion Department.                                                                                                      | Very Satisfied | Satisfied       | Average         | Dissatisfied |
|                              | 5. Satisfaction with emergency services of the Blood Transfusion Department.                                                                                                | Very Satisfied | Satisfied       | Average         | Dissatisfied |
|                              | 6. Your comments and suggestions (Please specify any dissatisfaction to facilitate improvement)                                                                             |                |                 |                 |              |
| Anesthesiology Department    |                                                                                                                                                                             | 5 points       | 4<br>point<br>s | 3<br>point<br>s | 2<br>points  |
|                              | 1. Satisfaction with pre-operative anesthesia visits.                                                                                                                       | Very Satisfied | Satisfied       | Average         | Dissatisfied |
|                              | 2. Satisfaction with the pre-operative three-party verification led by the Anesthesiology Department.                                                                       | Very Satisfied | Satisfied       | Average         | Dissatisfied |
|                              | 3. Satisfaction with intraoperative anesthesia management.                                                                                                                  | Very Satisfied | Satisfied       | Average         | Dissatisfied |
|                              | 4. Satisfaction with patient management in the Post-Anesthesia Care Unit (PACU).                                                                                            | Very Satisfied | Satisfied       | Average         | Dissatisfied |
|                              | 5. Satisfaction with post-operative anesthesia visits.                                                                                                                      | Very Satisfied | Satisfied       | Average         | Dissatisfied |
|                              | 6. Your comments and suggestions (Please specify any dissatisfaction to facilitate improvement)                                                                             |                |                 |                 |              |

**Please rate the performance of the clinical-platform departments listed below for the year 2022 and share any comments or suggestions you may have.**

| Department                         | Evaluation Item                                                                                  | Very Satisfied<br>(5 points) | Satisfied<br>(4 points) | Average<br>(3 points) | Dissatisfied<br>(2 points) |
|------------------------------------|--------------------------------------------------------------------------------------------------|------------------------------|-------------------------|-----------------------|----------------------------|
| Emergency Department               |                                                                                                  | 5 points                     | 4 points                | 3 points              | 2 points                   |
|                                    | 1. Satisfaction with the emergency process                                                       | Very Satisfied               | Satisfied               | Average               | Dissatisfied               |
|                                    | 2. Satisfaction with the necessity and rationality of emergency consultations                    | Very Satisfied               | Satisfied               | Average               | Dissatisfied               |
|                                    | 3. Satisfaction with the diagnosis and treatment of emergency patients                           | Very Satisfied               | Satisfied               | Average               | Dissatisfied               |
|                                    | 4. Satisfaction with the admission, transfer and handover process for emergency patients         | Very Satisfied               | Satisfied               | Average               | Dissatisfied               |
|                                    | 5. Satisfaction with the service attitude of the Emergency Department                            | Very Satisfied               | Satisfied               | Average               | Dissatisfied               |
|                                    | 6. Your comments and suggestions (Please specify any dissatisfaction to facilitate improvement)  |                              |                         |                       |                            |
| Intensive Care Medicine Department |                                                                                                  | 5 points                     | 4 points                | 3 points              | 2 points                   |
|                                    | 1. Satisfaction with the workflow of the Intensive Care Medicine Department                      | Very Satisfied               | Satisfied               | Average               | Dissatisfied               |
|                                    | 2. Satisfaction with the quality of consultations by the Intensive Care Medicine Department      | Very Satisfied               | Satisfied               | Average               | Dissatisfied               |
|                                    | 3. Satisfaction with the diagnosis and treatment by the Intensive Care Medicine Department       | Very Satisfied               | Satisfied               | Average               | Dissatisfied               |
|                                    | 4. Satisfaction with the transfer and handover process of the Intensive Care Medicine Department | Very Satisfied               | Satisfied               | Average               | Dissatisfied               |
|                                    | 5. Satisfaction with the service attitude of the Intensive Care Medicine Department              | Very Satisfied               | Satisfied               | Average               | Dissatisfied               |
|                                    | 6. Your comments and suggestions (Please specify any dissatisfaction to facilitate improvement)  |                              |                         |                       |                            |
| Surgery Center                     |                                                                                                  | 5 points                     | 4 points                | 3 points              | 2 points                   |

|                          |                                                                                                                                                    |                |           |          |              |
|--------------------------|----------------------------------------------------------------------------------------------------------------------------------------------------|----------------|-----------|----------|--------------|
|                          | 1. Satisfaction with the operating room scheduling based on emergency priority, surgeons' operating days and comprehensive resource considerations | Very Satisfied | Satisfied | Average  | Dissatisfied |
|                          | 2. Satisfaction with nurse cooperation during pre-operative and intra-operative periods                                                            | Very Satisfied | Satisfied | Average  | Dissatisfied |
|                          | 3. Satisfaction with the three-party verification led by the Surgery Center after surgery                                                          | Very Satisfied | Satisfied | Average  | Dissatisfied |
|                          | 4. Satisfaction with the coordination between consecutive surgeries and nurse work efficiency                                                      | Very Satisfied | Satisfied | Average  | Dissatisfied |
|                          | 5. Satisfaction with the strict adherence to aseptic principles by scrub and circulating nurses during surgery                                     | Very Satisfied | Satisfied | Average  | Dissatisfied |
|                          | 6. Your comments and suggestions (Please specify any dissatisfaction to facilitate improvement)                                                    |                |           |          |              |
| Health Management Center |                                                                                                                                                    | 5 points       | 4 points  | 3 points | 2 points     |
|                          | 1. Satisfaction with the workflow of the Health Management Center                                                                                  | Very Satisfied | Satisfied | Average  | Dissatisfied |
|                          | 2. Satisfaction with the diagnosis and treatment at the Health Management Center                                                                   | Very Satisfied | Satisfied | Average  | Dissatisfied |
|                          | 3. Satisfaction with the handling of critical values in physical examinations by the Health Management Center                                      | Very Satisfied | Satisfied | Average  | Dissatisfied |
|                          | 4. Satisfaction with the health follow-up by the Health Management Center                                                                          | Very Satisfied | Satisfied | Average  | Dissatisfied |
|                          | 5. Satisfaction with the coordination between the Health Management Center and clinical departments                                                | Very Satisfied | Satisfied | Average  | Dissatisfied |
|                          | 6. Your comments and suggestions (Please specify any dissatisfaction to facilitate improvement)                                                    |                |           |          |              |
| Day Surgery Department   |                                                                                                                                                    | 5 points       | 4 points  | 3 points | 2 points     |
|                          | 1. Satisfaction with the workflow of the Day Surgery Department                                                                                    | Very Satisfied | Satisfied | Average  | Dissatisfied |
|                          | 2. Satisfaction with patient management in the Day Surgery Department                                                                              | Very Satisfied | Satisfied | Average  | Dissatisfied |
|                          | 3. Satisfaction with the three-party verification led by the Day Surgery Department                                                                | Very Satisfied | Satisfied | Average  | Dissatisfied |



|                                    |                                                                                                               |                |           |          |              |
|------------------------------------|---------------------------------------------------------------------------------------------------------------|----------------|-----------|----------|--------------|
|                                    | 4. Satisfaction with the follow-up of discharged patients by the Day Surgery Department                       | Very Satisfied | Satisfied | Average  | Dissatisfied |
|                                    | 5. Satisfaction with the coordination between the Day Surgery Department and clinical departments             | Very Satisfied | Satisfied | Average  | Dissatisfied |
|                                    | 6. Your comments and suggestions (Please specify any dissatisfaction to facilitate improvement)               |                |           |          |              |
| Nutrition Department               |                                                                                                               | 5 points       | 4 points  | 3 points | 2 points     |
|                                    | 1. Satisfaction with the workflow of the Nutrition Department                                                 | Very Satisfied | Satisfied | Average  | Dissatisfied |
|                                    | 2. Satisfaction with the quality of consultations by the Nutrition Department                                 | Very Satisfied | Satisfied | Average  | Dissatisfied |
|                                    | 3. Satisfaction with the diagnosis and treatment by the Nutrition Department                                  | Very Satisfied | Satisfied | Average  | Dissatisfied |
|                                    | 4. Satisfaction with the subsequent visits of department patients to the Nutrition Clinic                     | Very Satisfied | Satisfied | Average  | Dissatisfied |
|                                    | 5. Satisfaction with the coordination between the Nutrition Department and clinical departments               | Very Satisfied | Satisfied | Average  | Dissatisfied |
|                                    | 6. Your comments and suggestions (Please specify any dissatisfaction to facilitate improvement)               |                |           |          |              |
| Rehabilitation Medicine Department |                                                                                                               | 5 points       | 4 points  | 3 points | 2 points     |
|                                    | 1. Satisfaction with the workflow of the Rehabilitation Medicine Department                                   | Very Satisfied | Satisfied | Average  | Dissatisfied |
|                                    | 2. Satisfaction with the quality of consultations by the Rehabilitation Medicine Department                   | Very Satisfied | Satisfied | Average  | Dissatisfied |
|                                    | 3. Satisfaction with the diagnosis and treatment by the Rehabilitation Medicine Department                    | Very Satisfied | Satisfied | Average  | Dissatisfied |
|                                    | 4. Satisfaction with the subsequent visits of department patients to the Rehabilitation Medicine Clinic       | Very Satisfied | Satisfied | Average  | Dissatisfied |
|                                    | 5. Satisfaction with the coordination between the Rehabilitation Medicine Department and clinical departments | Very Satisfied | Satisfied | Average  | Dissatisfied |
|                                    | 6. Your comments and suggestions (Please specify any dissatisfaction to facilitate improvement)               |                |           |          |              |
| Clinical Psychology                |                                                                                                               | 5 points       | 4 point   | 3 points | 2 point      |

|            |                                                                                                           |                |           |         |              |
|------------|-----------------------------------------------------------------------------------------------------------|----------------|-----------|---------|--------------|
| Department |                                                                                                           |                | s         |         | s            |
|            | 1. Satisfaction with the workflow of the Clinical Psychology Department                                   | Very Satisfied | Satisfied | Average | Dissatisfied |
|            | 2. Satisfaction with the quality of consultations by the Clinical Psychology Department                   | Very Satisfied | Satisfied | Average | Dissatisfied |
|            | 3. Satisfaction with the diagnosis and treatment by the Clinical Psychology Department                    | Very Satisfied | Satisfied | Average | Dissatisfied |
|            | 4. Satisfaction with the subsequent visits of department patients to the Clinical Psychology Clinic       | Very Satisfied | Satisfied | Average | Dissatisfied |
|            | 5. Satisfaction with the coordination between the Clinical Psychology Department and clinical departments | Very Satisfied | Satisfied | Average | Dissatisfied |
|            | 6. Your comments and suggestions (Please specify any dissatisfaction to facilitate improvement)           |                |           |         |              |

**Please rate the following platform departments for their performance in 2022 and share any comments or suggestions you may have.**

| Department                                                 | Evaluation Item                                                                                 | Very Satisfied<br>(5 points) | Satisfied<br>(4 points) | Average<br>(3 points) | Dissatisfied<br>(2 points) |
|------------------------------------------------------------|-------------------------------------------------------------------------------------------------|------------------------------|-------------------------|-----------------------|----------------------------|
| Central Sterile Supply Department                          | 1. Overall satisfaction with the Central Sterile Supply Department                              | Very Satisfied               | Satisfied               | Average               | Dissatisfied               |
|                                                            | 2. Your comments and suggestions (Please specify any dissatisfaction to facilitate improvement) |                              |                         |                       |                            |
| Blood Purification Center                                  | 1. Overall satisfaction with the Blood Purification Center                                      | Very Satisfied               | Satisfied               | Average               | Dissatisfied               |
|                                                            | 2. Your comments and suggestions (Please specify any dissatisfaction to facilitate improvement) |                              |                         |                       |                            |
| Outpatient Comprehensive Treatment Room                    | 1. Overall satisfaction with the Outpatient Comprehensive Treatment Room                        | Very Satisfied               | Satisfied               | Average               | Dissatisfied               |
|                                                            | 2. Your comments and suggestions (Please specify any dissatisfaction to facilitate improvement) |                              |                         |                       |                            |
| Endoscopy Center                                           | 1. Overall satisfaction with the Endoscopy Center                                               | Very Satisfied               | Satisfied               | Average               | Dissatisfied               |
|                                                            | 2. Your comments and suggestions (Please specify any dissatisfaction to facilitate improvement) |                              |                         |                       |                            |
| Emergency Operating Room (including hybrid operating room) | 1. Overall satisfaction with the Emergency Operating Room (including hybrid operating room)     | Very Satisfied               | Satisfied               | Average               | Dissatisfied               |
|                                                            | 2. Your comments and suggestions (Please specify any dissatisfaction to facilitate improvement) |                              |                         |                       |                            |
| Intravenous Drug                                           | 1. Overall satisfaction with the Intravenous Drug Dispensing Center                             | Very Satisfied               | Satisfied               | Average               | Dissatisfied               |
|                                                            | 2. Your comments and suggestions (Please specify any dissatisfaction to facilitate improvement) |                              |                         |                       |                            |

|                           |                                                                                                 |                |           |         |              |
|---------------------------|-------------------------------------------------------------------------------------------------|----------------|-----------|---------|--------------|
| Dispensing Center         |                                                                                                 |                |           |         |              |
| 120 Emergency Center      | 1. Overall satisfaction with the 120 Emergency Center                                           | Very Satisfied | Satisfied | Average | Dissatisfied |
|                           | 2. Your comments and suggestions (Please specify any dissatisfaction to facilitate improvement) |                |           |         |              |
| Fever Clinic              | 1. Overall satisfaction with the Fever Clinic                                                   | Very Satisfied | Satisfied | Average | Dissatisfied |
|                           | 2. Your comments and suggestions (Please specify any dissatisfaction to facilitate improvement) |                |           |         |              |
| Medical Laboratory Center | 1. Overall satisfaction with the Medical Laboratory Center                                      | Very Satisfied | Satisfied | Average | Dissatisfied |
|                           | 2. Your comments and suggestions (Please specify any dissatisfaction to facilitate improvement) |                |           |         |              |
| Radiotherapy Center       | 1. Overall satisfaction with the Radiotherapy Center                                            | Very Satisfied | Satisfied | Average | Dissatisfied |
|                           | 2. Your comments and suggestions (Please specify any dissatisfaction to facilitate improvement) |                |           |         |              |

# 2023 Annual Satisfaction Survey of Clinical Departments towards Medical-Technical and Clinical Platform Departments

Please evaluate the following medical-technical platform department groups for the year 2023 and provide your valuable comments and suggestions..

| Department           | Evaluation Item                                                                                                                                                    | Very Satisfied (5 points) | Satisfied (4 points) | Average (3 points) | Dissatisfied (2 points) |
|----------------------|--------------------------------------------------------------------------------------------------------------------------------------------------------------------|---------------------------|----------------------|--------------------|-------------------------|
| Radiology Department |                                                                                                                                                                    | 5 points                  | 4 points             | 3 points           | 2 points                |
|                      | 9. Satisfaction with the appointment scheduling for examinations.                                                                                                  | Very Satisfied            | Satisfied            | Average            | Dissatisfied            |
|                      | 10. Satisfaction with the timeliness of radiology report issuance.                                                                                                 | Very Satisfied            | Satisfied            | Average            | Dissatisfied            |
|                      | 3. When there are queries regarding radiology reports, satisfaction with the communication and handling between the Radiology Department and clinical departments. | Very Satisfied            | Satisfied            | Average            | Dissatisfied            |
|                      | 4. Satisfaction with the accuracy and timeliness of critical value reporting by the Radiology Department.                                                          | Very Satisfied            | Satisfied            | Average            | Dissatisfied            |
|                      | 5. Satisfaction with emergency services of the Radiology Department.                                                                                               | Very Satisfied            | Satisfied            | Average            | Dissatisfied            |
|                      | 6. Your comments and suggestions (Please specify any dissatisfaction to facilitate improvement)                                                                    |                           |                      |                    |                         |
| Pathology Department |                                                                                                                                                                    | 5 points                  | 4 points             | 3 points           | 2 points                |
|                      | 1. Satisfaction with the timeliness of pathology report issuance.                                                                                                  | Very Satisfied            | Satisfied            | Average            | Dissatisfied            |
|                      | 2. When there are queries regarding pathology reports, satisfaction with the communication and handling between the Pathology Department and clinical departments. | Very Satisfied            | Satisfied            | Average            | Dissatisfied            |
|                      | 3. Satisfaction with the quality of intraoperative frozen section biopsy reports.                                                                                  | Very Satisfied            | Satisfied            | Average            | Dissatisfied            |
|                      | 4. Satisfaction with the quality of the Pathology Department's participation in clinical consultations.                                                            | Very Satisfied            | Satisfied            | Average            | Dissatisfied            |
|                      | 5. Satisfaction with the range of tests offered by the Pathology Department in meeting clinical needs.                                                             | Very Satisfied            | Satisfied            | Average            | Dissatisfied            |
|                      | 6. Your comments and suggestions (Please specify any dissatisfaction to facilitate improvement)                                                                    |                           |                      |                    |                         |

|                             |                                                                                                                                                                                  |                |           |          |              |
|-----------------------------|----------------------------------------------------------------------------------------------------------------------------------------------------------------------------------|----------------|-----------|----------|--------------|
| Ultrasound Department       |                                                                                                                                                                                  | 5 points       | 4 points  | 3 points | 2 points     |
|                             | 1. Satisfaction with the appointment scheduling for ultrasound examinations.                                                                                                     | Very Satisfied | Satisfied | Average  | Dissatisfied |
|                             | 2. Satisfaction with the timeliness of ultrasound report issuance.                                                                                                               | Very Satisfied | Satisfied | Average  | Dissatisfied |
|                             | 3. When there are queries regarding ultrasound reports, satisfaction with the communication and handling between the Ultrasound Department and clinical departments.             | Very Satisfied | Satisfied | Average  | Dissatisfied |
|                             | 4. Satisfaction with the accuracy and timeliness of critical value reporting by the Ultrasound Department.                                                                       | Very Satisfied | Satisfied | Average  | Dissatisfied |
|                             | 5. Satisfaction with emergency services of the Ultrasound Department.                                                                                                            | Very Satisfied | Satisfied | Average  | Dissatisfied |
|                             | 6. Your comments and suggestions (Please specify any dissatisfaction to facilitate improvement)                                                                                  |                |           |          |              |
| Laboratory Department       |                                                                                                                                                                                  | 5 points       | 4 points  | 3 points | 2 points     |
|                             | 1. Satisfaction with the timeliness of laboratory report issuance.                                                                                                               | Very Satisfied | Satisfied | Average  | Dissatisfied |
|                             | 2. When there are queries regarding laboratory results, satisfaction with the communication and handling between the Laboratory Department and clinical departments.             | Very Satisfied | Satisfied | Average  | Dissatisfied |
|                             | 3. Satisfaction with the accuracy and timeliness of critical value reporting by the Laboratory Department.                                                                       | Very Satisfied | Satisfied | Average  | Dissatisfied |
|                             | 4. Satisfaction with the range of laboratory tests offered in meeting clinical needs.                                                                                            | Very Satisfied | Satisfied | Average  | Dissatisfied |
|                             | 5. Satisfaction with emergency services of the Laboratory Department.                                                                                                            | Very Satisfied | Satisfied | Average  | Dissatisfied |
|                             | 6. Your comments and suggestions (Please specify any dissatisfaction to facilitate improvement)                                                                                  |                |           |          |              |
| Nuclear Medicine Department |                                                                                                                                                                                  | 5 points       | 4 points  | 3 points | 2 points     |
|                             | 1. Satisfaction with the appointment scheduling for nuclear medicine examinations.                                                                                               | Very Satisfied | Satisfied | Average  | Dissatisfied |
|                             | 2. Satisfaction with the timeliness of nuclear medicine report issuance.                                                                                                         | Very Satisfied | Satisfied | Average  | Dissatisfied |
|                             | 3. When there are queries regarding nuclear medicine reports, satisfaction with the communication and handling between the Nuclear Medicine Department and clinical departments. | Very Satisfied | Satisfied | Average  | Dissatisfied |
|                             | 4. Satisfaction with the workflow of the Nuclear Medicine Department.                                                                                                            | Very Satisfied | Satisfied | Average  | Dissatisfied |
|                             | 5. Satisfaction with the service attitude of the Nuclear Medicine Department.                                                                                                    | Very Satisfied | Satisfied | Average  | Dissatisfied |
|                             | 6. Your comments and suggestions (Please specify any dissatisfaction to facilitate improvement)                                                                                  |                |           |          |              |
| Pharmacy                    |                                                                                                                                                                                  | 5 points       | 4         | 3        | 2            |

|                              |                                                                                                                                                                             |                |                 |                 |              |
|------------------------------|-----------------------------------------------------------------------------------------------------------------------------------------------------------------------------|----------------|-----------------|-----------------|--------------|
| Department                   |                                                                                                                                                                             |                | point<br>s      | point<br>s      | points       |
|                              | 1. Satisfaction with the pharmaceutical information and services provided by the Pharmacy Department.                                                                       | Very Satisfied | Satisfied       | Average         | Dissatisfied |
|                              | 2. Satisfaction with the quality of the Pharmacy Department's participation in clinical consultations.                                                                      | Very Satisfied | Satisfied       | Average         | Dissatisfied |
|                              | 3. Satisfaction with drug supply availability.                                                                                                                              | Very Satisfied | Satisfied       | Average         | Dissatisfied |
|                              | 4. Satisfaction with the delivery of clinical medications.                                                                                                                  | Very Satisfied | Satisfied       | Average         | Dissatisfied |
|                              | 5. Satisfaction with the services of the emergency pharmacy.                                                                                                                | Very Satisfied | Satisfied       | Average         | Dissatisfied |
|                              | 6. Your comments and suggestions (Please specify any dissatisfaction to facilitate improvement)                                                                             |                |                 |                 |              |
| Blood Transfusion Department |                                                                                                                                                                             | 5 points       | 4<br>point<br>s | 3<br>point<br>s | 2<br>points  |
|                              | 1. Satisfaction with the timeliness of blood test report issuance by the Blood Transfusion Department.                                                                      | Very Satisfied | Satisfied       | Average         | Dissatisfied |
|                              | 2. Satisfaction with the timeliness of blood issuance when blood supply is sufficient.                                                                                      | Very Satisfied | Satisfied       | Average         | Dissatisfied |
|                              | 3. When there are queries regarding blood test results, satisfaction with the communication and handling between the Blood Transfusion Department and clinical departments. | Very Satisfied | Satisfied       | Average         | Dissatisfied |
|                              | 4. Satisfaction with the workflow of the Blood Transfusion Department.                                                                                                      | Very Satisfied | Satisfied       | Average         | Dissatisfied |
|                              | 5. Satisfaction with emergency services of the Blood Transfusion Department.                                                                                                | Very Satisfied | Satisfied       | Average         | Dissatisfied |
|                              | 6. Your comments and suggestions (Please specify any dissatisfaction to facilitate improvement)                                                                             |                |                 |                 |              |
| Anesthesiology Department    |                                                                                                                                                                             | 5 points       | 4<br>point<br>s | 3<br>point<br>s | 2<br>points  |
|                              | 1. Satisfaction with pre-operative anesthesia visits.                                                                                                                       | Very Satisfied | Satisfied       | Average         | Dissatisfied |
|                              | 2. Satisfaction with the pre-operative three-party verification led by the Anesthesiology Department.                                                                       | Very Satisfied | Satisfied       | Average         | Dissatisfied |
|                              | 3. Satisfaction with intraoperative anesthesia management.                                                                                                                  | Very Satisfied | Satisfied       | Average         | Dissatisfied |
|                              | 4. Satisfaction with patient management in the Post-Anesthesia Care Unit (PACU).                                                                                            | Very Satisfied | Satisfied       | Average         | Dissatisfied |
|                              | 5. Satisfaction with post-operative anesthesia visits.                                                                                                                      | Very Satisfied | Satisfied       | Average         | Dissatisfied |
|                              | 6. Your comments and suggestions (Please specify any dissatisfaction to facilitate improvement)                                                                             |                |                 |                 |              |

**Please rate the performance of the clinical-platform departments listed below for the year 2023 and share any comments or suggestions you may have.**

| Department                         | Evaluation Item                                                                                  | Very Satisfied<br>(5 points) | Satisfied<br>(4 points) | Average<br>(3 points) | Dissatisfied<br>(2 points) |
|------------------------------------|--------------------------------------------------------------------------------------------------|------------------------------|-------------------------|-----------------------|----------------------------|
| Emergency Department               |                                                                                                  | 5 points                     | 4 points                | 3 points              | 2 points                   |
|                                    | 1. Satisfaction with the emergency process                                                       | Very Satisfied               | Satisfied               | Average               | Dissatisfied               |
|                                    | 2. Satisfaction with the necessity and rationality of emergency consultations                    | Very Satisfied               | Satisfied               | Average               | Dissatisfied               |
|                                    | 3. Satisfaction with the diagnosis and treatment of emergency patients                           | Very Satisfied               | Satisfied               | Average               | Dissatisfied               |
|                                    | 4. Satisfaction with the admission, transfer and handover process for emergency patients         | Very Satisfied               | Satisfied               | Average               | Dissatisfied               |
|                                    | 5. Satisfaction with the service attitude of the Emergency Department                            | Very Satisfied               | Satisfied               | Average               | Dissatisfied               |
|                                    | 6. Your comments and suggestions (Please specify any dissatisfaction to facilitate improvement)  |                              |                         |                       |                            |
| Intensive Care Medicine Department |                                                                                                  | 5 points                     | 4 points                | 3 points              | 2 points                   |
|                                    | 1. Satisfaction with the workflow of the Intensive Care Medicine Department                      | Very Satisfied               | Satisfied               | Average               | Dissatisfied               |
|                                    | 2. Satisfaction with the quality of consultations by the Intensive Care Medicine Department      | Very Satisfied               | Satisfied               | Average               | Dissatisfied               |
|                                    | 3. Satisfaction with the diagnosis and treatment by the Intensive Care Medicine Department       | Very Satisfied               | Satisfied               | Average               | Dissatisfied               |
|                                    | 4. Satisfaction with the transfer and handover process of the Intensive Care Medicine Department | Very Satisfied               | Satisfied               | Average               | Dissatisfied               |
|                                    | 5. Satisfaction with the service attitude of the Intensive Care Medicine Department              | Very Satisfied               | Satisfied               | Average               | Dissatisfied               |
|                                    | 6. Your comments and suggestions (Please specify any dissatisfaction to facilitate improvement)  |                              |                         |                       |                            |
| Surgery Center                     |                                                                                                  | 5 points                     | 4 points                | 3 points              | 2 points                   |

|                          |                                                                                                                                                    |                |           |          |              |
|--------------------------|----------------------------------------------------------------------------------------------------------------------------------------------------|----------------|-----------|----------|--------------|
|                          | 1. Satisfaction with the operating room scheduling based on emergency priority, surgeons' operating days and comprehensive resource considerations | Very Satisfied | Satisfied | Average  | Dissatisfied |
|                          | 2. Satisfaction with nurse cooperation during pre-operative and intra-operative periods                                                            | Very Satisfied | Satisfied | Average  | Dissatisfied |
|                          | 3. Satisfaction with the three-party verification led by the Surgery Center after surgery                                                          | Very Satisfied | Satisfied | Average  | Dissatisfied |
|                          | 4. Satisfaction with the coordination between consecutive surgeries and nurse work efficiency                                                      | Very Satisfied | Satisfied | Average  | Dissatisfied |
|                          | 5. Satisfaction with the strict adherence to aseptic principles by scrub and circulating nurses during surgery                                     | Very Satisfied | Satisfied | Average  | Dissatisfied |
|                          | 6. Your comments and suggestions (Please specify any dissatisfaction to facilitate improvement)                                                    |                |           |          |              |
| Health Management Center |                                                                                                                                                    | 5 points       | 4 points  | 3 points | 2 points     |
|                          | 1. Satisfaction with the workflow of the Health Management Center                                                                                  | Very Satisfied | Satisfied | Average  | Dissatisfied |
|                          | 2. Satisfaction with the diagnosis and treatment at the Health Management Center                                                                   | Very Satisfied | Satisfied | Average  | Dissatisfied |
|                          | 3. Satisfaction with the handling of critical values in physical examinations by the Health Management Center                                      | Very Satisfied | Satisfied | Average  | Dissatisfied |
|                          | 4. Satisfaction with the health follow-up by the Health Management Center                                                                          | Very Satisfied | Satisfied | Average  | Dissatisfied |
|                          | 5. Satisfaction with the coordination between the Health Management Center and clinical departments                                                | Very Satisfied | Satisfied | Average  | Dissatisfied |
|                          | 6. Your comments and suggestions (Please specify any dissatisfaction to facilitate improvement)                                                    |                |           |          |              |
| Day Surgery Department   |                                                                                                                                                    | 5 points       | 4 points  | 3 points | 2 points     |
|                          | 1. Satisfaction with the workflow of the Day Surgery Department                                                                                    | Very Satisfied | Satisfied | Average  | Dissatisfied |
|                          | 2. Satisfaction with patient management in the Day Surgery Department                                                                              | Very Satisfied | Satisfied | Average  | Dissatisfied |
|                          | 3. Satisfaction with the three-party verification led by the Day Surgery Department                                                                | Very Satisfied | Satisfied | Average  | Dissatisfied |



|                                    |                                                                                                               |                |           |          |              |
|------------------------------------|---------------------------------------------------------------------------------------------------------------|----------------|-----------|----------|--------------|
|                                    | 4. Satisfaction with the follow-up of discharged patients by the Day Surgery Department                       | Very Satisfied | Satisfied | Average  | Dissatisfied |
|                                    | 5. Satisfaction with the coordination between the Day Surgery Department and clinical departments             | Very Satisfied | Satisfied | Average  | Dissatisfied |
|                                    | 6. Your comments and suggestions (Please specify any dissatisfaction to facilitate improvement)               |                |           |          |              |
| Nutrition Department               |                                                                                                               | 5 points       | 4 points  | 3 points | 2 points     |
|                                    | 1. Satisfaction with the workflow of the Nutrition Department                                                 | Very Satisfied | Satisfied | Average  | Dissatisfied |
|                                    | 2. Satisfaction with the quality of consultations by the Nutrition Department                                 | Very Satisfied | Satisfied | Average  | Dissatisfied |
|                                    | 3. Satisfaction with the diagnosis and treatment by the Nutrition Department                                  | Very Satisfied | Satisfied | Average  | Dissatisfied |
|                                    | 4. Satisfaction with the subsequent visits of department patients to the Nutrition Clinic                     | Very Satisfied | Satisfied | Average  | Dissatisfied |
|                                    | 5. Satisfaction with the coordination between the Nutrition Department and clinical departments               | Very Satisfied | Satisfied | Average  | Dissatisfied |
|                                    | 6. Your comments and suggestions (Please specify any dissatisfaction to facilitate improvement)               |                |           |          |              |
| Rehabilitation Medicine Department |                                                                                                               | 5 points       | 4 points  | 3 points | 2 points     |
|                                    | 1. Satisfaction with the workflow of the Rehabilitation Medicine Department                                   | Very Satisfied | Satisfied | Average  | Dissatisfied |
|                                    | 2. Satisfaction with the quality of consultations by the Rehabilitation Medicine Department                   | Very Satisfied | Satisfied | Average  | Dissatisfied |
|                                    | 3. Satisfaction with the diagnosis and treatment by the Rehabilitation Medicine Department                    | Very Satisfied | Satisfied | Average  | Dissatisfied |
|                                    | 4. Satisfaction with the subsequent visits of department patients to the Rehabilitation Medicine Clinic       | Very Satisfied | Satisfied | Average  | Dissatisfied |
|                                    | 5. Satisfaction with the coordination between the Rehabilitation Medicine Department and clinical departments | Very Satisfied | Satisfied | Average  | Dissatisfied |
|                                    | 6. Your comments and suggestions (Please specify any dissatisfaction to facilitate improvement)               |                |           |          |              |
| Clinical Psychology                |                                                                                                               | 5 points       | 4 point   | 3 points | 2 point      |

|                                                                                                 |                                                                                                           |                |           |         |              |
|-------------------------------------------------------------------------------------------------|-----------------------------------------------------------------------------------------------------------|----------------|-----------|---------|--------------|
| Department                                                                                      |                                                                                                           |                | s         |         | s            |
|                                                                                                 | 1. Satisfaction with the workflow of the Clinical Psychology Department                                   | Very Satisfied | Satisfied | Average | Dissatisfied |
|                                                                                                 | 2. Satisfaction with the quality of consultations by the Clinical Psychology Department                   | Very Satisfied | Satisfied | Average | Dissatisfied |
|                                                                                                 | 3. Satisfaction with the diagnosis and treatment by the Clinical Psychology Department                    | Very Satisfied | Satisfied | Average | Dissatisfied |
|                                                                                                 | 4. Satisfaction with the subsequent visits of department patients to the Clinical Psychology Clinic       | Very Satisfied | Satisfied | Average | Dissatisfied |
|                                                                                                 | 5. Satisfaction with the coordination between the Clinical Psychology Department and clinical departments | Very Satisfied | Satisfied | Average | Dissatisfied |
| 6. Your comments and suggestions (Please specify any dissatisfaction to facilitate improvement) |                                                                                                           |                |           |         |              |

**Please rate the following platform departments for their performance in 2023 and share any comments or suggestions you may have.**

| Department                                                 | Evaluation Item                                                                                 | Very Satisfied<br>(5 points) | Satisfied<br>(4 points) | Average<br>(3 points) | Dissatisfied<br>(2 points) |
|------------------------------------------------------------|-------------------------------------------------------------------------------------------------|------------------------------|-------------------------|-----------------------|----------------------------|
| Central Sterile Supply Department                          | 1. Overall satisfaction with the Central Sterile Supply Department                              | Very Satisfied               | Satisfied               | Average               | Dissatisfied               |
|                                                            | 2. Your comments and suggestions (Please specify any dissatisfaction to facilitate improvement) |                              |                         |                       |                            |
| Blood Purification Center                                  | 1. Overall satisfaction with the Blood Purification Center                                      | Very Satisfied               | Satisfied               | Average               | Dissatisfied               |
|                                                            | 2. Your comments and suggestions (Please specify any dissatisfaction to facilitate improvement) |                              |                         |                       |                            |
| Outpatient Comprehensive Treatment Room                    | 1. Overall satisfaction with the Outpatient Comprehensive Treatment Room                        | Very Satisfied               | Satisfied               | Average               | Dissatisfied               |
|                                                            | 2. Your comments and suggestions (Please specify any dissatisfaction to facilitate improvement) |                              |                         |                       |                            |
| Endoscopy Center                                           | 1. Overall satisfaction with the Endoscopy Center                                               | Very Satisfied               | Satisfied               | Average               | Dissatisfied               |
|                                                            | 2. Your comments and suggestions (Please specify any dissatisfaction to facilitate improvement) |                              |                         |                       |                            |
| Emergency Operating Room (including hybrid operating room) | 1. Overall satisfaction with the Emergency Operating Room (including hybrid operating room)     | Very Satisfied               | Satisfied               | Average               | Dissatisfied               |
|                                                            | 2. Your comments and suggestions (Please specify any dissatisfaction to facilitate improvement) |                              |                         |                       |                            |
| Intravenous Drug                                           | 1. Overall satisfaction with the Intravenous Drug Dispensing Center                             | Very Satisfied               | Satisfied               | Average               | Dissatisfied               |
|                                                            | 2. Your comments and suggestions (Please specify any dissatisfaction to facilitate improvement) |                              |                         |                       |                            |

|                              |                                                                                                 |                |           |         |              |
|------------------------------|-------------------------------------------------------------------------------------------------|----------------|-----------|---------|--------------|
| Dispensing Center            |                                                                                                 |                |           |         |              |
| 120 Emergency Center         | 1. Overall satisfaction with the 120 Emergency Center                                           | Very Satisfied | Satisfied | Average | Dissatisfied |
|                              | 2. Your comments and suggestions (Please specify any dissatisfaction to facilitate improvement) |                |           |         |              |
| Fever Clinic                 | 1. Overall satisfaction with the Fever Clinic                                                   | Very Satisfied | Satisfied | Average | Dissatisfied |
|                              | 2. Your comments and suggestions (Please specify any dissatisfaction to facilitate improvement) |                |           |         |              |
| Medical Laboratory Center    | 1. Overall satisfaction with the Medical Laboratory Center                                      | Very Satisfied | Satisfied | Average | Dissatisfied |
|                              | 2. Your comments and suggestions (Please specify any dissatisfaction to facilitate improvement) |                |           |         |              |
| Radiotherapy Center          | 1. Overall satisfaction with the Radiotherapy Center                                            | Very Satisfied | Satisfied | Average | Dissatisfied |
|                              | 2. Your comments and suggestions (Please specify any dissatisfaction to facilitate improvement) |                |           |         |              |
| Reproductive Medicine Center | 1. Overall satisfaction with the Reproductive Medicine Center                                   | Very Satisfied | Satisfied | Average | Dissatisfied |
|                              | 2. Your comments and suggestions (Please specify any dissatisfaction to facilitate improvement) |                |           |         |              |
